# Supplementary material
Source: PubMed Central journal article supplement (PMC2245831)
Supplement: plntphys_pp.107.112821_1.pdf [file plntphys_pp.107.112821_1.pdf]

**Supplemental Figure S1.** Position and pattern of introns within the basic and hinge regions of the bZIP domains of the OsbZIP transcription factors.

| <u>OsbZIP No.</u> | <u>Protein</u> | BASIC REGION                  | HINGE                        | <u>Pattern of introns</u>   |  |
|-------------------|----------------|-------------------------------|------------------------------|-----------------------------|--|
|                   |                | ←-----→                       |                              |                             |  |
| OsbZIP02          | <b>RISBZ4</b>  | ---TVDPKRVKR                  | ILANRQSAQRSRVKQLQYISEL       |                             |  |
| OsbZIP06          |                | ---IRDPKRVKR                  | ILANRQSAQRSRVKQLQYISEL       |                             |  |
| OsbZIP15          |                | ---PLDVKRVRR                  | MVSNRESARRSRKRKQAHLADL       |                             |  |
| OsbZIP18          |                | ---DKEHKRLKR                  | LLRNRVSAQQARERKKAYLNLDL      |                             |  |
| OsbZIP19          |                | ---IADPKRVKR                  | ILANRQSAQRSRVKQLQYISEL       |                             |  |
| OsbZIP20          |                | <b>RITA-1</b>                 | ---PLDVKRMRR                 | MVSNRESARRSRKRKQAHLADL      |  |
| OsbZIP25          |                | ---LADPKRVKR                  | VLANRQSAARSKERKMRYIAEL       |                             |  |
| OsbZIP30          |                | <b>RF2b</b>                   | ---AIDPKRAKR                 | ILANRQSAARSKERKARYITEL      |  |
| OsbZIP33          |                | <b>REB</b>                    | ---PADQLQRR                  | KQSNRESARRSRKAAHLNEL        |  |
| OsbZIP35          |                | ---LTDPRRVKR                  | ILNNRASATKSKEKKMKHVGEEL      | <b>a</b>                    |  |
| OsbZIP36          |                | ---LVDPKRAKR                  | ILANRQSAARSKERKMRYIAEL       |                             |  |
| OsbZIP48          |                | ---DKEHRRLKR                  | LLRNRVSAQQARERKKAYMSEL       |                             |  |
| OsbZIP50          |                | ---DDPMSKKKR                  | QMRNRDSAMKSREKKMYVKDL        |                             |  |
| OsbZIP52          |                | <b>RISBZ5</b>                 | ---STETKRIRR                 | MVSNRESARRSRKRKQQLSEL       |  |
| OsbZIP58          |                | <b>RISBZ1</b>                 | ---DEEDKVKKR                 | KESNRESARRSRKAAHLKDL        |  |
| OsbZIP61          |                | ---AIDPKRAKR                  | ILANRQSAARSKERKARYITEL       |                             |  |
| OsbZIP68          |                | ---LTDPKRVKR                  | ILANRQSAARSKERKMRYIQEL       |                             |  |
| OsbZIP75          |                | <b>RF2a</b>                   | ---LVDPKRAKR                 | ILANRQSAARSKERKMRYIAEL      |  |
| OsbZIP76          | ---LSDPKVKR    | VLCNRRSAARSKERRLNYKLEL        |                              |                             |  |
| OsbZIP78          | ---LADPKRVKR   | VLANRQSAARSKERKMRYIAEL        |                              |                             |  |
| OsbZIP81          | ---LLDPKRAKR   | ILANRQSAARSKERKIKYTSEL        |                              |                             |  |
| OsbZIP84          | ---LIDPKRAKR   | ILANRQSAARSKERKIKYTSEL        |                              |                             |  |
| OsbZIP05          | <b>OSBZ8</b>   | ---DKESKRERRKQSNRESARRSRLRKQ  | AEETEEL                      |                             |  |
| OsbZIP09          |                | ---KLMERRQKRMKKNRESAARSARKQ   | AYTNEL                       |                             |  |
| OsbZIP10          |                | ---KTVERRQRRMIKNRESAARSARKQ   | AYTVEL                       |                             |  |
| OsbZIP12          |                | ---RAAMQRQKRMKKNRESAARSREKQ   | AYIAEL                       |                             |  |
| OsbZIP13          |                | ---ERELKKQKRKQSNRESARRSRLRKQ  | AECEEL                       |                             |  |
| OsbZIP17          |                | ---TPDAKTLRRLAQNREAAARKSRLRKK | AYIQNL                       |                             |  |
| OsbZIP23          |                | ---KVVERRQRRMIKNRESAARSQRKQ   | AYMMEL                       |                             |  |
| OsbZIP26          |                | ---ERELKRQKRKQSNRESARRSRLRKQ  | AEWEEV                       |                             |  |
| OsbZIP29          |                | ---KTVERRKRMKKNRESAARSARKQ    | AYTNEL                       |                             |  |
| OsbZIP34          |                | ---ERELKRERRKQSNRESARRSRLRKQ  | ERPTSFCHPPNYPVTFYGLTNQECEL   |                             |  |
| OsbZIP40          |                | ---RAAMQRQKRMKKNRESAARSREKQ   | AYIAEL                       |                             |  |
| OsbZIP42          |                | ---KLVERRQKRMKKNRESAARSARKQ   | AYTNEL                       | <b>b</b>                    |  |
| OsbZIP45          |                | ---ERELKREKRKQSNRESARRSRLRKQ  | AEATEDL                      |                             |  |
| OsbZIP46          |                | ---KVVERRQRRMIKNRESAARSARKQ   | AYIMEL                       |                             |  |
| OsbZIP49          |                | ---TPDPKTLRRLAQNREAAARKSRLRKK | AYIQQL                       |                             |  |
| OsbZIP54          |                | ---SGDDRRTIRMMRNRESALRSRARKR  | AYVEEL                       |                             |  |
| OsbZIP55          |                | ---SGDDRRTIRMMRNRESALRSRARKR  | AYVEEL                       |                             |  |
| OsbZIP56          |                | ---SGDDRRTIRMMRNRESALRSRARKR  | AYVEEL                       |                             |  |
| OsbZIP59          |                | ---ERELKRERRKQSNRESARRSRLRKQ  | QECEEL                       |                             |  |
| OsbZIP62          |                | ---KTVERRQKRMKKNRESAARSARKQ   | AYTNEL                       |                             |  |
| OsbZIP66          |                | <b>TRAB1</b>                  | ---KVVERRQRRMIKNRESAARSARKQ  | AYTMEL                      |  |
| OsbZIP72          |                | ---KVVERRQRRMIKNRESAARSARKQ   | AYTLEL                       |                             |  |
| OsbZIP80          |                | <b>OsZIP-2a</b>               | ---EKEAKRLRRVLANRESARQTILRRQ | AIRDEL                      |  |
| OsbZIP86          |                | <b>OsZIP-1a</b>               | ---ERELKRQRRKQSNRESARRSRLRKQ | AECEEL                      |  |
| OsbZIP03          |                | <b>OsZIP-1b</b>               | ---HEDQK                     | TLRRLAQNREAAARKSRLRKKAYVQQL |  |
| OsbZIP08          |                |                               | ---KLDHK                     | TLRRLAQNREAAARKSRLRKKAYIQNL |  |
| OsbZIP11          |                |                               | ---SVDAK                     | TLRRLAQNREAAARKSRLRKKAYVQNL |  |
| OsbZIP28          |                |                               | ---PMDQK                     | TLRRLAQNREAAARKSRLRKKAYVQQL |  |
| OsbZIP37          |                |                               | ---KPPDK                     | TLRRLAQNREAAARKSRLRKKAYIQQL |  |
| OsbZIP41          |                |                               | ---LLDAKT                    | TLRRLAQNREAAARKSRLRKKAYVQQL |  |
| OsbZIP43          | ---DKNIRM      |                               | TLRRLAQNREAAARKSRLRKKAYVQQL  |                             |  |
| OsbZIP63          | ---LMDQK       |                               | TLRRLAQNREAAARKSRLRKKAYVQQL  |                             |  |
| OsbZIP64          | ---KPRDK       |                               | TLRRLAQNREAAARKSRLRKKAYIQNL  |                             |  |
| OsbZIP70          | ---TLDPK       |                               | TLRRLAQNREAAARKSRLRKKAYIQQL  |                             |  |
| OsbZIP74          | ---ERDPK       |                               | TLRRLAQNREAAARKSRLRKKAYIQQL  |                             |  |
| OsbZIP79          | ---KALDPK      |                               | TLRRLAQNREAAARKSRLRKKAYIQQL  |                             |  |
| OsbZIP83          | ---KTLPK       |                               | TLRRLAQNREAAARKSRLRKKAYIQQL  | <b>c</b>                    |  |

OsbZIP47 ----RGDQKMQRRRLAQNREAAARKSRMRKKAYIQQL  
 OsbZIP82 -----EADTKRAKQRYAQRSRVRKLQYIAEL  
 OsbZIP21 -----EKSLKR RSGQSRVRKLQYIADL  
  
 OsbZIP01 ----DKEQNRLKRLLRNRFVSAQQARERKKAYMTEL  
 OsbZIP04 ----VMEERKKRKESNRLSAQRSRARKQQQLDEL  
 OsbZIP07 ----EELRKTTRKPLGNREAVRKYREKKKAHA AFL  
 OsbZIP14 ----LMEQRRAKRMLSNRESARRSRMRKQRHLDDL  
 OsbZIP16 ----GNDERKKRRLVSNRESARRSRVRKQRRLDEL  
 OsbZIP22 ----LAEERRRRRMI SNRESARRSRMRKQQLSEL  
 OsbZIP24 ----EEEEKKTIRMMKNRESALRSRARKRAYVQEL  
 OsbZIP27 ---AEEERQRNRKRSNRLSAQRSRIKKQYVDGL  
 OsbZIP31 ----DADERLRRKISNRESARRSRARKQRHLDEL  
 OsbZIP32 ---EEEEERRQRKVSNRLSARRSRARKQRLEEL  
 OsbZIP38 ---GADERKKRMLSNRESARRSRARKQRLEEL  
 OsbZIP39 ----EEDERRAARLMNRRESAQLSRQKKRYVEEL  
 OsbZIP44 ----KEDLTKTRRPLGNREAVRKYREKKKAHA AFL  
 OsbZIP51 ----RRDERKERRLASNRESARRSRVRRRQLDEL  
 OsbZIP53 --SPTENNASKKRPSGNRAAVRKYREKKKAHTASL  
 OsbZIP57 ----EERRRRLRKKISNRESARRSRARRQRVEEL  
 OsbZIP60 ----DDEAKRRARLVNRRESAHQSRQRKKQYVEEL  
 OsbZIP65 ----QMDLKRKRKESNRESAKRSRLRKQHLDDL  
 OsbZIP67 ----AEEERRRRRMVSNRESARRSRMRKQRQSEL  
 OsbZIP69 ----GGVERRKRKRAMKNRESAERSRARKQAYLQEL  
 OsbZIP71 ----QMEKKRKRKESNRESARRSRMRKQHLDEL  
 OsbZIP73 ----AEEERRRRRMI SNRESARRSRMRKQRQSEL  
 OsbZIP77 ----AAGDRRKRMIKNRESAARSRARKQARVNNL  
 OsbZIP85 -----NKLLP'TTHFRQYQRSRVRKLQYIAEL  
 OsbZIP87 ---AADHRREKRRLSNRESARRSRLRKQHLDEL  
 OsbZIP88 EDTDPVNAKRTRRMLSNRESARRSRKRKQAHNLNDL  
 OsbZIP89 --ADEERRRRLRRI SNRESARRSRARKQRHLDEL

LIP19

OsOBF1

d  
e  
f

g
