# Supplementary material
Source: PubMed Central journal article supplement (PMC2245831)
Supplement: plntphys_pp.107.112821_2.pdf [file plntphys_pp.107.112821_2.pdf]

**Supplemental Figure S2.** Alignment of basic and hinge regions of OsbZIP proteins. The OsbZIP proteins are classified into 11 groups (I-XI) according to their DNA binding specificity and amino acid sequences in basic and hinge regions. Conserved amino acids are boxed. Amino acid numbering is according to Suckow et al. (1993). The first leucine in leucine heptad repeats is numbered +1 and the last amino acid of the basic and hinge regions is -1. The basic and hinge regions of some of the already characterized plant bZIP proteins having similar amino acid sequences in the basic-hinge region are also shown with some of the group members for comparison and classification into different groups. Amino acid residues like K and I present in group IX and XI, respectively, are coloured since they differ from the usual R at -10 positions. OsbZIP No. corresponding to the basic and hinge region sequences of OsbZIP proteins and protein names of already characterized OsbZIP proteins are also given on the left hand side.

| OsbZIP No.         | Protein          | BASIC REGION                                             |     |     |     |     |    |    | HINGE |     | Group |
|--------------------|------------------|----------------------------------------------------------|-----|-----|-----|-----|----|----|-------|-----|-------|
|                    |                  | -30                                                      | -25 | -20 | -15 | -10 | -5 | -1 |       |     |       |
|                    |                  | *                                                        | *   | *   | *   | *   | *  | *  | *     |     |       |
| <b>Wheat</b>       | <b>EmBP-1</b>    | DERELKRRERKQSNRESARRSRLRKKQAECEEL                        |     |     |     |     |    |    |       |     |       |
| OsbZIP13           |                  | ---ERELKKQKRKQSNRESARRSRLRKKQAECEEL                      |     |     |     |     |    |    |       | I   |       |
| OsbZIP26           |                  | ---ERELKRQKRKQSNRESARRSRLRKKQAEWEEV                      |     |     |     |     |    |    |       |     |       |
| OsbZIP59           |                  | ---ERELKRRERKQSNRESARRSRLRKKQAECEEL                      |     |     |     |     |    |    |       |     |       |
| OsbZIP86           | <b>OsZIP-1a</b>  | ---ERELKRQRKQSNRESARRSRLRKKQAECEEL                       |     |     |     |     |    |    |       |     |       |
| OsbZIP45           |                  | ---ERELKREKRKQSNRESARRSRLRKKQAEEDL                       |     |     |     |     |    |    |       |     |       |
| OsbZIP05           | <b>OSBZ8</b>     | ---DKESKRERKQSNRESARRSRLRKKQAETEEL                       |     |     |     |     |    |    |       |     |       |
| OsbZIP34           |                  | ---ERELKRRERKQSNRESARRSRLRKKQERPFSFCHPPNYPVTFYGLTNQEQEEL |     |     |     |     |    |    |       |     |       |
| <b>Soybean</b>     | <b>STF1</b>      | ---DKESKRLKRLLRNRVSAQQARERKKAYLIDL                       |     |     |     |     |    |    |       | II  |       |
| OsbZIP01           |                  | ---DKEQNRLKRLLRNRVSAQQARERKKAYMTEL                       |     |     |     |     |    |    |       |     |       |
| OsbZIP48           |                  | ---DKEHRRLLKRLLRNRVSAQQARERKKAYMSEL                      |     |     |     |     |    |    |       |     |       |
| OsbZIP18           |                  | ---DKEHKRLKRLLRNRVSAQQARERKKAYLNDL                       |     |     |     |     |    |    |       |     |       |
| <b>Tobacco</b>     | <b>TGA1b</b>     | ---DEDEKRRARLVNRNSAQLSRQRKKHYVEEL                        |     |     |     |     |    |    |       | III |       |
| OsbZIP50           |                  | ---DDPMSKKRRQMRNRDSAMKSRERKKMYVKDL                       |     |     |     |     |    |    |       |     |       |
| OsbZIP39           |                  | ---EEDERRAARLMRNRNSAQLSRQRKKRYVEEL                       |     |     |     |     |    |    |       |     |       |
| OsbZIP60           |                  | ---DDEAKRRARLVNRNSAHLQSRQRKKQYVEEL                       |     |     |     |     |    |    |       |     |       |
| OsbZIP54           |                  | ---SGDDRRTIRMMRNRNSALRSRARKRAYVEEL                       |     |     |     |     |    |    |       |     |       |
| OsbZIP55           |                  | ---SGDDRRTIRMMRNRNSALRSRARKRAYVEEL                       |     |     |     |     |    |    |       |     |       |
| OsbZIP56           |                  | ---SGDDRRTIRMMRNRNSALRSRARKRAYVEEL                       |     |     |     |     |    |    |       |     |       |
| <b>Maize</b>       | <b>OPAQUE2</b>   | ---PTEERVRRKRESNRESARRSRYSRKAHLKEL                       |     |     |     |     |    |    |       | IV  |       |
| OsbZIP33           | <b>REB</b>       | ---PADQLRQRKQSNRESARRSRSRKAAHLNEL                        |     |     |     |     |    |    |       |     |       |
| OsbZIP15           | <b>RISBZ4</b>    | ---PLDVKVRMRMVSNRNSARRSRKRKQAHLADL                       |     |     |     |     |    |    |       |     |       |
| OsbZIP20           | <b>RITA-1</b>    | ---PLDVKMRMRMVSNRNSARRSRKRKQAHLADL                       |     |     |     |     |    |    |       |     |       |
| OsbZIP88           |                  | EDTDPVNAKRTRRMLSNRESARRSRKRKQAHLNDL                      |     |     |     |     |    |    |       |     |       |
| OsbZIP65           |                  | ---QMDLKRKRKRESNRESAKRSRLRKKQHLDL                        |     |     |     |     |    |    |       |     |       |
| OsbZIP71           |                  | ---QMEKRRKRKRESNRESARRSRMRKQQLDEL                        |     |     |     |     |    |    |       |     |       |
| OsbZIP14           |                  | ---LMEQRRAKRMLSNRESARRSRMRKQRHLDDL                       |     |     |     |     |    |    |       |     |       |
| OsbZIP67           |                  | ---AEEERRRRMVSNRNSARRSRMRKQRQLSEL                        |     |     |     |     |    |    |       |     |       |
| OsbZIP73           |                  | ---AEEERRRRMISNRNSARRSRMRKQRQLSEL                        |     |     |     |     |    |    |       |     |       |
| OsbZIP22           |                  | ---LAEERRRRMISNRNSARRSRMRKQQLSEL                         |     |     |     |     |    |    |       |     |       |
| OsbZIP52           | <b>RISBZ5</b>    | ---STETKRIRRMVSNRESARRSRRRKQQLSEL                        |     |     |     |     |    |    |       |     |       |
| OsbZIP58           | <b>RISBZ1</b>    | ---DEEDKVKKRKESNRESARRSRKAAARLKD                         |     |     |     |     |    |    |       |     |       |
| OsbZIP16           |                  | ---GNDERKKRRLVSNRESARRSRVRKQRRLDEL                       |     |     |     |     |    |    |       |     |       |
| OsbZIP51           |                  | ---RRDERKERRLASNRNSARRSVRRRRQLDEL                        |     |     |     |     |    |    |       |     |       |
| OsbZIP38           | <b>LIP19</b>     | ---GADERKKRMLSNRESARRSRARKQQLDEL                         |     |     |     |     |    |    |       |     |       |
| OsbZIP87           | <b>OsOBF1</b>    | ---AADHRREKRRLSNRESARRSRLRKKQHLDL                        |     |     |     |     |    |    |       |     |       |
| OsbZIP31           |                  | ---DADERRLRKKISNRNSARRSRARKQRHLDEL                       |     |     |     |     |    |    |       |     |       |
| OsbZIP89           |                  | --ADEERRRRLRRISNRNSARRSRARKQRHLDEL                       |     |     |     |     |    |    |       |     |       |
| OsbZIP32           |                  | ---EEEEERRRQRKVSNRNSARRSRARKQQLDEL                       |     |     |     |     |    |    |       |     |       |
| OsbZIP57           |                  | ---EERRRRLRKKISNRNSARRSRARRRQRVEEL                       |     |     |     |     |    |    |       |     |       |
| OsbZIP04           |                  | ---VMEERKKRRESNRLSAQRSRARKQQLDEL                         |     |     |     |     |    |    |       |     |       |
| OsbZIP27           |                  | ---AEEEEERQRNRKRSNRLSAQRSRIRKQYVDGL                      |     |     |     |     |    |    |       |     |       |
| <b>Antirrhinum</b> | <b>AmbZIP910</b> | ---DDDERKKRKLKSNRESARRSRMRKQQLDEL                        |     |     |     |     |    |    |       |     |       |

|                                   |                 |                                          |      |
|-----------------------------------|-----------------|------------------------------------------|------|
| OsbZIP06                          |                 | ----IRDPKRVKRI LANRQSAQR SRVRK LQYISEL   | V    |
| OsbZIP19                          |                 | ----IADPKRVKRI LANRQSAQR SRVRK LQYISEL   |      |
| OsbZIP02                          |                 | ----TVDPKRVKRI LANRQSAQR SRVRK LQYISEL   |      |
| OsbZIP09                          |                 | ----KLMERRQKRMI KNRESAAR SRARKQAYTNEL    |      |
| OsbZIP42                          |                 | ----KLVERRQKRMI KNRESAAR SRARKQAYTNEL    |      |
| OsbZIP29                          |                 | ----KTVERRKKRMI KNRESAAR SRARKQAYTNEL    |      |
| OsbZIP62                          |                 | ----KTVERRQKRMI KNRESAAR SRARKQAYTNEL    |      |
| OsbZIP10                          |                 | ----KTVERRQRRMI KNRESAAR SRARKQAYTVEL    |      |
| OsbZIP66                          | <b>TRAB1</b>    | ----KVVERRQRRMI KNRESAAR SRARKQAYTMEL    |      |
| OsbZIP72                          |                 | ----KVVERRQRRMI KNRESAAR SRARKQAYTLEL    | VI   |
| OsbZIP46                          |                 | ----KVVERRQRRMI KNRESAAR SRARKQAYIMEL    |      |
| OsbZIP23                          |                 | ----KVVERRQRRMI KNRESAAR SRQRKQAYMMEL    |      |
| OsbZIP12                          |                 | ----RAAMQRQKRMI KNRESAAR SRERKQAYIAEL    |      |
| OsbZIP40                          |                 | ----RAAMQRQKRMI KNRESAAR SRERKQAYIAEL    |      |
| OsbZIP77                          |                 | ----AAGDRRKRMI KNRESAAR SRARKQARVNNL     |      |
| OsbZIP24                          |                 | ----EEEEKTI RMM KNRESALR SRARKRAYVQEL    |      |
| OsbZIP69                          |                 | ----GGVERRKRRAM KNRESAER SRARKQAYLQEL    |      |
| <b>Tobacco</b>                    | <b>TGA1a</b>    | <b>SKPVEKVLRR LAQNREAAK SRLRKKAYVQQL</b> |      |
| OsbZIP28                          |                 | ---PMDQKVLRR LAQNREAAK SRLRKKAYVQQL      |      |
| OsbZIP63                          |                 | ----LMDQKTIRR LAQNREAAK SRLRKKAYVQQL     |      |
| OsbZIP03                          |                 | ----HEDQKTLRR LAQNREAAK SRLRKKAYVQQL     |      |
| OsbZIP11                          |                 | ----SVDAKTERR LAQNREAAK SRLRKKAYVQNL     |      |
| OsbZIP41                          |                 | ----LLDAKTERR LAQNREAAK SRLRKKAYVQQL     |      |
| OsbZIP43                          |                 | ---DKNIRMTLRR LAQNREAAK SRLRKKAYVQQL     |      |
| OsbZIP08                          |                 | ----KLDHKTLRR LAQNREAAK SRLRKKAYIQNL     |      |
| OsbZIP17                          |                 | ----TPDAKTLRR LAQNREAAK SRLRKKAYIQNL     | VII  |
| OsbZIP49                          |                 | ----TPDPKTLRR LAQNREAAK SRLRKKAYIQQL     |      |
| OsbZIP70                          |                 | ----TLDPKTLRR LAQNREAAK SRLRKKAYIQQL     |      |
| OsbZIP74                          |                 | ----ERDPKTLRR LAQNREAAK SRLRKKAYIQQL     |      |
| OsbZIP79                          |                 | ---KALDPKTMRR LAQNREAAK SRLRKKAYIQQL     |      |
| OsbZIP83                          |                 | ---KTLDPKIMRR LAQNREAAK SRLRKKAYIQQL     |      |
| OsbZIP37                          |                 | ----KPPDKVLRR LAQNREAAK SRLRKKAYIQQL     |      |
| OsbZIP64                          |                 | ----KPRDKIQRR LAQNREAAK SRLRKKAYIQNL     |      |
| OsbZIP47                          |                 | ----RGDQKMQRRLAQNREAAK SRMRKKAYIQQL      |      |
| OsbZIP07                          |                 | ----EELRKTTRKPLGNREAVRKYREKKKAHA AFL     |      |
| OsbZIP44                          |                 | ----KEDLTKTRRPLGNREAVRKYREKKKAHA AFL     | VIII |
| OsbZIP53                          |                 | --SPTENNASKKRPSGNRAAVRKYREKKKAHTASL      |      |
| <b>Tobacco</b>                    | <b>RSG</b>      | -----DPKRAKRILANRQSAARSKERKIRYTSSEL      |      |
| <b>Arabidopsis</b>                | <b>PosF21</b>   | -----KRAKRIWANRQSAARSKERKTRYIFEL         |      |
| OsbZIP25                          |                 | ----LADPKRVKRVLANRQSAARSKERKMRYIAEL      |      |
| OsbZIP78                          |                 | ----LADPKRVKRVLANRQSAARSKERKMRYIAEL      |      |
| OsbZIP68                          |                 | ----LTDPKRVKRI LANRQSAARSKERKMRYIQEL     |      |
| OsbZIP36                          |                 | ----LVDPKRAKRILANRQSAARSKERKMRYIAEL      |      |
| OsbZIP75                          | <b>RF2a</b>     | ----LVDPKRAKRIWANRQSAARSKERKMRYIAEL      | IX   |
| OsbZIP30                          | <b>RF2b</b>     | ----AIDPKRAKRILANRQSAARSKERKARYITEL      |      |
| OsbZIP61                          |                 | ----AIDPKRAKRILANRQSAARSKERKARYITEL      |      |
| OsbZIP81                          |                 | ----LLDPKRAKRILANRQSAARSKERKIKYTGEL      |      |
| OsbZIP84                          |                 | ----LIDPKRAKRILANRQSAARSKERKIKYTSSEL     |      |
| OsbZIP35                          |                 | ----LTDPRRVKRI LNNRASATKSKEKMKHV GEL     |      |
| OsbZIP76                          |                 | ----LSDPKKVKRVLCNRRSAARSKERRLNYKLEL      |      |
| N in core basic region is missing |                 |                                          |      |
| OsbZIP82                          |                 | -----EADTKRAKQQAQR SRVRK LQYIAEL         |      |
| OsbZIP85                          |                 | -----NKLLPPTHFRQYAQR SRVRK LQYIAEL       | X    |
| OsbZIP21                          |                 | -----EKSLKRRSGQR SRVRK LQYIADL           |      |
| OsbZIP80                          | <b>OsZIP-2a</b> | ----EKEAKRLRRVLANRESARQTILRRQAIRDEL      | XI   |

#### LITERATURE CITED

Suckow M, von Wilcken-Bergmann B, Muller-Hill B (1993) Identification of three residues in the basic regions of the bZIP proteins GCN4, C/EBP and TAF-1 that are involved in specific DNA binding. EMBO J 12: 1193-1200.
