# Supplementary material
Source: PubMed Central journal article supplement (PMC2245831)
Supplement: plntphys_pp.107.112821_3.pdf [file plntphys_pp.107.112821_3.pdf]

**Supplemental Figure S3.** Amino acid sequence alignment of the leucine zipper region of 89 OsbZIP proteins. The OsbZIP proteins are classified into 29 sub-families (BZ1-BZ29) with similar predicted dimerization properties. OsbZIP No. and protein names of already characterized OsbZIP proteins have been mentioned. The leucine zipper region is divided into heptads (*gabcdef*) to visualize the potential  $g \leftrightarrow e'$  pairs. A colour code is used to highlight the amino acids predicted to regulate both the dimerization specificity and stability. Four colours are used to differentiate between different  $g \leftrightarrow e'$  pairs. Attractive basic-acidic pairs ( $R \leftrightarrow E$  and  $K \leftrightarrow E$ ) are coloured orange, attractive acidic-basic pairs ( $E \leftrightarrow R$ ,  $E \leftrightarrow K$ ,  $D \leftrightarrow R$ , and  $D \leftrightarrow K$ ) are blue, repulsive basic pairs ( $K \leftrightarrow K$ ,  $R \leftrightarrow K$ ,  $R \leftrightarrow Q$ ,  $Q \leftrightarrow K$ , and  $K \leftrightarrow Q$ ) are pink and repulsive acidic pairs ( $E \leftrightarrow E$ ,  $E \leftrightarrow D$ ,  $E \leftrightarrow Q$ , and  $Q \leftrightarrow E$ ) are green. If only one of the two amino acids in the  $g \leftrightarrow e'$  pair is charged, the residue is coloured pink for basic and green for acidic. If the *a* or *d* position is polar, it is coloured grey and if either is charged, it is coloured brown. Asparagines at a position are coloured red. The prolines and glycines are bold to indicate a potential break in the  $\alpha$ -helix. The predicted C-terminal boundary is denoted by the symbol #, other than the natural terminals which are indicated by \*.

| Sub-family | OsbZIP No. | Protein   | Leucine Zipper Region |               |                 |                 |                  |                 |                 |                 |                  |               |  |  |  |
|------------|------------|-----------|-----------------------|---------------|-----------------|-----------------|------------------|-----------------|-----------------|-----------------|------------------|---------------|--|--|--|
|            |            |           | L0<br>gabcdef         | L1<br>gabcdef | L2<br>gabcdef   | L3<br>gabcdef   | L4<br>gabcdef    | L5<br>gabcdef   | L6<br>gabcdef   | L7<br>gabcdef   | L8<br>gabcdef    | L9<br>gabcdef |  |  |  |
| BZ1        | OsbZIP09   |           | YTNELEN               | KVSRLEE       | ENVRLKR#KQELDEL | ICAVPVP         | EPKYQLR          | RTSSADF         |                 |                 |                  |               |  |  |  |
|            | OsbZIP42   |           | YTNELEN               | KVLRLEE       | ENERLKK#KQELDEI | LNSAPP          | EPKYQLR          | RTSSAAF         |                 |                 |                  |               |  |  |  |
|            | OsbZIP62   |           | YTNELEN               | KISRLEE       | ENQRLRE#HKAVADF | STFPSCV         | DFLKAPL          | TQKLEPV         | MQIVPQP         | EPKQQLR         | RTTSASF          |               |  |  |  |
|            | OsbZIP29   |           | YTNELEN               | KISRLEE       | ENKRLRM#HKVSKPV | FVHHFQE         | P                |                 |                 |                 |                  |               |  |  |  |
| BZ2        | OsbZIP18   |           | YLNDLEV               | KVKDLEK       | KNSELEE         | RFSTLQN         | ENQMLRQ          | ILKNTTV#SRRGPGS | TASGEGQ         |                 |                  |               |  |  |  |
|            | OsbZIP48   |           | YMSELEA               | RVKDLER       | SNSELEE         | RLSTLQN         | ENQMLRQ          | VLKNTTA#NRRGPD  | SAGGDS          |                 |                  |               |  |  |  |
|            | OsbZIP01   |           | YMTELEA               | KAKDLEL       | RNABLEEQ        | RVSTLQN         | ENNTLRQ          | ILKNTTA#HAGKRGG | GGGGGGK         | KHHFTKS         |                  |               |  |  |  |
| BZ3        | OsbZIP39   |           | YVEELEE               | KVKSMHS       | VINDLNS         | RISFVVA         | ENATLRQ#QLSGGSV  | NCPPEGV         | YPPAPIP         | GMHFPWM         | PGYAMRP          |               |  |  |  |
|            | OsbZIP60   |           | YVEELEG               | KVKVMQA       | TIADLTA         | RISCVTA         | ENAAALKQ#QLGGAAG | AGAAAAP         | PPMPMYP         | AVYPLPM         | PWIHPAY          |               |  |  |  |
| BZ4        | OsbZIP50   |           | YVKDLET               | KSKYLEA       | ECRRLSY         | ALQCCAA         | ENMALRQ#SLLKDRP  | VGAATAM         | QESAVLT         | ETLPLVS         | LLWLVS           |               |  |  |  |
| BZ5        | OsbZIP05   | OSBZ8     | ETEELAR               | KVELLTA       | ENTSLRR         | EISRLTE         | SSKLLRL          | ENSALME#KLTETGP | DEAQEVP         | PVKTKAQ         | QARGVEN          |               |  |  |  |
|            | OsbZIP45   |           |                       | ETEDLAT       | QVESLTA         | ENTSLRS         | EISRLSE          | SSEKLLR         | ENSALMG#KLDPA   | STQAEFS         | LQKTTTA          | SSRPVVE       |  |  |  |
| BZ6        | OsbZIP13   | OsbZIP-1a | ECEELSV               | RADNLR        | ENSSLRA         | ELERIKK         | EYBALLS          | HNASLKE#KLEGN   | SIPYMNE         | QNDTNGT         | HQKQKDS          |               |  |  |  |
|            | OsbZIP86   |           |                       | ECEBLAQ       | RAEVLKQ         | ENTSLRD         | EVNRIRK          | EYDELLS         | KNSSLKE#KLEDKQH | KTDEAGV         | DNKLQHS          | GDDSQK        |  |  |  |
| BZ7        | OsbZIP26   |           | EWEEVAN               | RADLLKQ       | ENSSLKE         | ELKQLQE         | KCNLSLTS         | ENTTLHE         | KLKELEG#EKSNNGN | YKE             |                  |               |  |  |  |
| BZ8        | OsbZIP34   |           | ECEELSQ               | KVTELT        | VNSTLMT         | ELDKLKK         | DCEDMEA          | ENSQLMD#EMVQSEG | SSVIATL         | SVKIDTS         | KDRHGSS          |               |  |  |  |
|            | OsbZIP59   |           | ECEELAR               | KVAELT        | ENSALRS         | ELDQLK          | ACEDMEA          | ENTRLMG#DKAQYK  | PTVITTL         | GMSIDSS         | KTQHDD           |               |  |  |  |
| BZ9        | OsbZIP69   |           | YLQELEQ               | EVRRLLR       | ENAAALRH        | QCHQLKA#AAAAEAE | AAAAAAA          | AAKKPTS         | SATF            |                 |                  |               |  |  |  |
|            | OsbZIP77   |           | RVNMLET               | EVQQLKQ       | ENKMLRV#KYEQGH  | GQWLEK          | SLARFSQ          | MSIFVSP         | RSQYVAT         | LERVLM          |                  |               |  |  |  |
|            | OsbZIP10   |           | YTVELEA               | ELNYLKQ       | ENARLKE         | AEKTVLL         | TKKQMLV#EKMMEQS  | KEKMNAN         | RGGSQLR         | RSQSCMW         |                  |               |  |  |  |
| BZ10       | OsbZIP24   |           | YVQELEK               | EVRRLVN       | ENLKLKR         | HCKQLKT         | EMAAALIQ#OPTNKQS | SHRRSS          | T               |                 |                  |               |  |  |  |
|            | OsbZIP54   |           | YVEELEK               | EVRRLVD       | DNLNLKK         | CKEKGSG         | MREDIVC          | R*              |                 |                 |                  |               |  |  |  |
|            | OsbZIP55   |           | YVEELEK               | EVRRLVD       | DNLNLKK         | CKEKLKQ         | EVAALVM#PTKSSLR  | RTSSTQF         |                 |                 |                  |               |  |  |  |
|            | OsbZIP56   |           | YVEELEK               | EVRRLVD       | DNLNLKK         | CKEKLKQ         | EVAALVM#PTKSSLR  | RTSSTQF         |                 |                 |                  |               |  |  |  |
| BZ11       | OsbZIP67   |           | QLSELWA               | QVEHLRG       | ANRRLLD         | ELNRALR         | GCADVR           | ENSLRLD         | EKAELAG#KLQLLLP | RQPAPK          | NAADDQS          |               |  |  |  |
|            | OsbZIP73   |           | QLSELRG               | QVHLRD        | ANRRLLD         | ELNQAMR         | GCSDVHC          | ENARLRK         | ERABLQT         | KLEHLMQ#AQKNNTS | PSSSQPC          |               |  |  |  |
|            | OsbZIP22   |           | QLSELWA               | QVHLRS        | TNRQLLD         | QLNHVIR         | DCDRVTH          | ENQQLRD         | EQAKLQK#QLEKTPV | ENTESTF         | MGPDN            |               |  |  |  |
|            | OsbZIP16   |           | RLDELSE               | QVSELRD       | TNRQLLV         | ELNHMIS         | KHARIVR          | ENSQLRE         | EASDLQR         | KLSEMM          | EDAEEVAA#AAAAAAR |               |  |  |  |
|            | OsbZIP04   |           | QLDELTA               | QVAALRA       | RNGALGL         | AAREAAR         | RCAAVRA          | ENELLRA         | RSVELAA         | RLDSDLT         | LAQCCLD#AAAAASF  |               |  |  |  |
| BZ12       | OsbZIP51   |           | QLDELSS               | HVAELRA       | ANHRLAV         | ELNRAAA         | RHAQMAR          | ENARLAE         | EARALRE#RLPLRGG | GGGGGDG         | EAEEEAG          |               |  |  |  |
|            | OsbZIP31   |           | HLDELRA               | RAERLR        | CNRELA          | RGHAAAG         | RAGLVRL          | ANAWLRA         | AAAALTR         | RLAAAR#AIALGLQ  | YRPAAAA          |               |  |  |  |
|            | OsbZIP89   |           | HLDELRA               | KASALRA       | TSRDLVA         | RLRGARA         | RAALVAL          | TNAQLRD         | EAGKLAL         | RLAAAR#VIALRQL  | YSAAAAA          |               |  |  |  |
|            | OsbZIP32   |           | RLEELRG               | ESARLRA       | ENRELA          | RLHAVAR         | HGLAVR           | QNRARLA         | EAAALAR         | RLALQR#LARGHRM  | MITASPP          |               |  |  |  |
| BZ13       | OsbZIP65   |           | HLDDLTS               | QVNQLKM       | ENQQLTT         | TLNMVTQ         | SCAFES           | QNSVLRT         | QMMELDS         | RLSALRE         | IFYMN#GNQSPSN    |               |  |  |  |
|            | OsbZIP71   |           | HLDELTS               | QVNQLKN       | QVQQLSM         | ALSLTQ          | NLVAVQA          | QNSVLQT         | QLELQS          | RLCALTD         | ILMCMNN#SATPTFP  |               |  |  |  |
|            | OsbZIP14   |           | HLDDLTA               | QVAHLR        | ENAHVAT         | ALGLTQ          | GLLAVDA          | ENAVLRT         | QAALAA          | RLASLND         | ILSCINT#NGAAAAA  |               |  |  |  |
| BZ14       | OsbZIP38   | LIP19     | RLEELIA               | EAARLQA       | ENARVEA         | QIGAVAG         | ELSKVDG          | ENAVLRA         | RHGLAG          | RLQALVS         | VLEILQV#AGAPVDI  |               |  |  |  |
|            | OsbZIP87   | OsOBf1    | HLDELVQ               | EVARLQA       | DNARVLA         | RASEIAG         | QYARVEQ          | ENTVLRA         | RAAELGD         | RLRSQNS         | VLRVVE#FSGVAMD   |               |  |  |  |
| BZ15       | OsbZIP15   | RISBZ4    | HLADLES               | QVDQLRG       | ENASLRFK        | QLTDANQ         | QFTTSVT          | DNRILKS         | DVEALRV#KVKMAED | MVARGAL         | SCGLGHL          |               |  |  |  |
|            | OsbZIP20   | RITA-1    | HLADLET               | QVDQLRG       | ENASLRFK        | QLTDANQ         | QFTTAVT          | DNRILKS         | DVEALRV#KVKMAED | MVARGAL         | SCGLGHL          |               |  |  |  |
|            | OsbZIP52   | RISBZ5    | QLSELAS               | QVQLKRG       | ENSSLFK         | QLTESSQ         | QFNATVT          | DNRILKS         | DVEALRV#KVKMAED | MVARAAM         | SCGLGQL          |               |  |  |  |
| BZ16       | OsbZIP33   | REB       | HLNELEA               | QVSQLEV       | ENSSLLR         | RLADVNO         | KYNDAAV          | DNRVLKA         | DVETLRA         | KVKMAED         | SVKRVTG#MNALFPA  |               |  |  |  |
|            | OsbZIP58   | RISBZ1    | RLKDLLE               | QVSLLEV       | ENSSLLR         | RLADANQ         | KYSAAA           | DNRVLMA         | DIEALRA         | KVRMAE          | SVKMVTG          | ARQLHQ##      |  |  |  |
|            | OsbZIP88   |           | HLNDLES               | QVSQLES       | ENASLRFK        | RLSDMTQ         | KYKQSTT          | EYGNLQD         | DMNAMRR         | KLVIABE         | AVRRVTG          | IGLQFT#       |  |  |  |
| BZ17       | OsbZIP27   |           | YVDGLAV               | EAEQLRR       | ENDAMRA         | GAGAVLQ         | RCLRVEQ          | ENRVLAA         | HARELCS         | AVNLRAS         | QLRLLGE#VAGVPLD  |               |  |  |  |
| BZ18       | OsbZIP07   |           | HAAFLLE               | EVKKLRT       | TNQQLLR         | RLQGHIS         | LEAEVVR          | LRALLFD         | IRGKIDA#EIGTFPF | QKQCSFG         | SVCTDTH          |               |  |  |  |
|            | OsbZIP44   |           | HAAFLLE               | EVKKLRA       | ANQQLLK         | RLQGHAA         | LEAEVIR          | LRSLLD          | VRGKID#EIGTFPF  | QKPCSVG         | SVACTDP          |               |  |  |  |
|            | OsbZIP53   |           | HTASLEE               | EVVHLRA       | LNQQLMK         | KLQNHAT         | LEAEVSR          | LRCLLVD         | IRGRIG#EIGAFPY  | QRVKN           | DLVSSVD          |               |  |  |  |
| BZ19       | OsbZIP12   |           | YIAELES               | LVTQLEE       | ENAKMFK#EQEEQHQ | KRLKELK         | EMVVPVI          | IRKTSAR         | DLRRTNS         | MEW             |                  |               |  |  |  |
|            | OsbZIP40   |           | YIAELEA               | QVALEEE       | EHAQLLR#EQEENQ  | KRLKEIK         | EQAVAVV          | IRKKTQD         | LRRTNSM         | EW              |                  |               |  |  |  |
|            | OsbZIP80   | OsbZIP-2a | IRDELAR               | KVADLSS       | QNETMK#VAIRTIK  | KAVAEP          | MDTAPPA          | QQQAETA         | AAVAPPT         | TATPPT          | APQPSFL          |               |  |  |  |
| BZ20       | OsbZIP23   |           | YMMELEA               | EVAKLKE       | LNDELQK         | KQDEMLE#QQKNEVL | ERMSRQV          | GPTAKRI         | CLRRTLT         | GPW             |                  |               |  |  |  |
|            | OsbZIP46   |           | YIMELEA               | EVAKLKE       | QKABELQK        | KQVEMIQ#KQNDVEM | ERITQQQ          | GPKAKRF         | CLRRTLT         | GPC             |                  |               |  |  |  |
|            | OsbZIP66   |           | YTMELEA               | EVQKLKE       | QNMELQK         | KQEEIME#MQKNFFP | EMQKNQV          | LEAVNPP         | YGQKRCR         | LRRLTLG         | PW               |               |  |  |  |
|            | OsbZIP72   | TRAB1     | YTLELEA               | EVQKLKE       | MNKELER         | KQADIME#MQKNEVE | EMIKDPF          | GRKRKLC         | LRRLTLG         | PW              |                  |               |  |  |  |
| BZ21       | OsbZIP06   |           | YISELER               | SVTTLQN       | EVSLSVP         | RVAFLDQ         | QRTILTV          | GNSHLQK         | RIAALAQ         | DKIFKDA         | HQEALRK          | EIERLRQ#      |  |  |  |
|            | OsbZIP19   |           | YISELER               | SVTTLQM       | EVSLSVP         | RVAFLDH         | QRSLLTV          | GNSHLQK         | RIAALAQ         | DKIFKDA         | HQEALRK          | EIERLRQ#      |  |  |  |
| BZ22       | OsbZIP02   |           | YISELER               | SVTSLQT       | EVSLSVP         | RVAFLDH         | QRSLLTL          | GNSHLQK         | RIAALAQ#DKIFKDG | GTEGEDR         | EAAANLP          |               |  |  |  |

|             |                                                                                                                                                                                                              |                          |                                                                                                                                                                                                                                                                                                                                                                                                                                                                                                                                                                                                                                                                                                                                                                                                                                                                                                                                                                                                                                                                                                                                                                                                                                                                                                                                                |
|-------------|--------------------------------------------------------------------------------------------------------------------------------------------------------------------------------------------------------------|--------------------------|------------------------------------------------------------------------------------------------------------------------------------------------------------------------------------------------------------------------------------------------------------------------------------------------------------------------------------------------------------------------------------------------------------------------------------------------------------------------------------------------------------------------------------------------------------------------------------------------------------------------------------------------------------------------------------------------------------------------------------------------------------------------------------------------------------------------------------------------------------------------------------------------------------------------------------------------------------------------------------------------------------------------------------------------------------------------------------------------------------------------------------------------------------------------------------------------------------------------------------------------------------------------------------------------------------------------------------------------|
| <b>BZ23</b> | OsbsZIP21<br>OsbsZIP76                                                                                                                                                                                       |                          | YIADLER TVDSLQN IGADLAV RVASLRFQ LRNALSM ENKQLRR QITSLQQ AKLIKDG QTQMLKK ETERLKK#<br>YKLELES KVLVLRKI IEKELSE RLATAQR TFNELLA QNNELKI KIQTGR ERQMKEA IPKISIGY ESLQVVV#                                                                                                                                                                                                                                                                                                                                                                                                                                                                                                                                                                                                                                                                                                                                                                                                                                                                                                                                                                                                                                                                                                                                                                         |
| <b>BZ24</b> | OsbsZIP57                                                                                                                                                                                                    |                          | RVEELER AADELFA ERRALAS RLDAIAR RALAVRG ANARHHA EAGVLRRL RLGEAQR NAAVLIG LSRLLRS#                                                                                                                                                                                                                                                                                                                                                                                                                                                                                                                                                                                                                                                                                                                                                                                                                                                                                                                                                                                                                                                                                                                                                                                                                                                              |
| <b>BZ25</b> | OsbsZIP82<br>OsbsZIP85                                                                                                                                                                                       |                          | YIAELER KVQALQS EGDVSA EMEFLSQ QNIMLDD ENKALKQ RLESQAQ EQLIKRF QQEMFER EIGRLRS#<br>YIAELER RVQALQT EGVVESA EMDFLGQ QNIMLDD ENKALKQ RLESLSQ EHLIKRF QQEMFER EIGRLRS#                                                                                                                                                                                                                                                                                                                                                                                                                                                                                                                                                                                                                                                                                                                                                                                                                                                                                                                                                                                                                                                                                                                                                                            |
| <b>BZ26</b> | OsbsZIP25<br>OsbsZIP78<br>OsbsZIP68                                                                                                                                                                          |                          | YIAELEQ KVQILQS EATNLSA QLTMQR DSAGLAT QNNELKF RLHAMEQ QAQLRDA LNEALTT EVQRLKL#<br>YIAELEQ KVQILQT EATTLA QLTLQR DSSGMAT QNNELKF RLQSMEE QAQLRDA LNEALTA EVQRLKL#<br>YIQELEH KVQVLTQ EATTLA QLTMQR DSTGLAT QNNELKI RLQAMEQ QAQLRDA LNEALTA EVQRLKL#                                                                                                                                                                                                                                                                                                                                                                                                                                                                                                                                                                                                                                                                                                                                                                                                                                                                                                                                                                                                                                                                                            |
| <b>BZ27</b> | OsbsZIP36<br>OsbsZIP75<br>OsbsZIP81<br>OsbsZIP84<br>OsbsZIP30<br>OsbsZIP61                                                                                                                                   | RF2a<br><br><br><br>RF2b | YIAELER KVQTLQT EATTLA QLTMQR DTTGLTS ENSDLKI RVQTMEE QVRLQDA LNDRLPD BIQQLVK#<br>YIAELER KVQTLQT EATTLA QLALLQR DTSGLTT ENSDLKI RLQTMEE QVHLQDA LNDTLKS EVQRLKV#<br>YTGELER KVQTLQT EATTLA QLTLQR DTSGLTA ENRELKL RLQSMEE QAKLRDA LNDALRE EVQRLKI#<br>YTSELER KVQTLQT EATTLA QLTLQR DTSGLTA ENRELKL RLQSMEE QAKLRDA LNEALRE EVQRLKI#<br>YITELER KVQTLQT EATTLA QLTLFQR DTTGLSA ENAELKI RLQAMEQ QAQLRDA LNDALPK EVBLRLKI#<br>YITELER KVQTLQT EATTLA QLTLFQR DTTGLSA ENAELKI RLQAMEQ QAQLRDA LNDALPK EVERLKI#                                                                                                                                                                                                                                                                                                                                                                                                                                                                                                                                                                                                                                                                                                                                                                                                                                   |
| <b>BZ28</b> | OsbsZIP35                                                                                                                                                                                                    |                          | HVGLQR KLQVLQS ETTTLGA QVTVMQR NNNELVS QNNELKT RLQAMDQ LAQLGDA LTRSLAA EAQHLRA#                                                                                                                                                                                                                                                                                                                                                                                                                                                                                                                                                                                                                                                                                                                                                                                                                                                                                                                                                                                                                                                                                                                                                                                                                                                                |
| <b>BZ29</b> | OsbsZIP03<br>OsbsZIP08<br>OsbsZIP28<br>OsbsZIP63<br>OsbsZIP47<br>OsbsZIP43<br>OsbsZIP11<br>OsbsZIP41<br>OsbsZIP79<br>OsbsZIP83<br>OsbsZIP37<br>OsbsZIP17<br>OsbsZIP49<br>OsbsZIP70<br>OsbsZIP74<br>OsbsZIP64 |                          | YVQLEN SRLKLTQ LEQELQR#ARQQGIF ISSSVDQ THMSGN GALAFDM EYARWLE EHNKQIN ELRSAVN<br>YIQNLES SRLKLTQ IEQELQR#ARQQGIF ISTSSDQ SHSASGN GALAFDM EYARWLE EHNKHIN ELRAAVN<br>YVQLES SKLKLAS LEQELQR#ARQQGIF ISSSGDQ THMSGN GALTFDL EYARWLE EQNKQIN ELRTAVN<br>YVQLES SKLKLQA LEQELQR#ARQQGIF ISSSGDQ THMSGN GALTFDL EYTRWLE EQNKQIN ELRTAVN<br>YIQLES SRKLMH LEQELQR#ARQQGIF IATGSSG DHGHSIG NGTFLAF DLEYARW LDEHQRH INDLRVA<br>YVQLED SRMKLTQ LEQELQR#ARQQGIF ISTSGDQ QRSTSEN EALAFNM EYMRWLE EHNKQIN ELRSAVH<br>YVQLET SRVRLQQ IEQELQR#ARQQGIF LGGCRAA GDMSSGA AMFDMY ARWLDDD SKRLTDL RGGJQAH<br>YVQLET SRVRLQQ IEQELQR#ARQQGIF PGGCSAP GDMSSGA VMFDMY TRWIDDD SKCMAL EQALQAO<br>YIQLES SKLKLQA MEQDIHR#ARQQGIF LGAPGN TSSGAM FDVDYAR WLEEDG RMAELHG GLHAHLP<br>YIQLES SKLKLQA MEQDLR#ARQQGIF LGGSPGG NTSAGAA MFDAEYG RWLEDG RMAELH GGLHAHL<br>YIQLET SRLKLQA LEQELQR#ARQQAVY ANGSLRE PNLGFTG PIDPGAL GFEIKYS HWVDEQN RNTGELR<br>YIQLET SRIRLSQ LEQELQR#ARQQGAF ILGGGAF SAGIGGQ SPEAAWF DGEYARW VESHERM MAHMRAA<br>YIQLET GRIRLAH LEQELQR#ARQQGAF CGAGILS PDAALFN LEYERWQ EAHHQVI SRLRAAV EBHRPDG<br>YIQLES SRIRLSQ LEQQVHV#ARVQGM LGAGDQH QGLFSPG SAASLFD LEYGRWV EBHSLKI FQLRAAL<br>YIQLES SRIRLAH LEQELHT#ARQQGVF FPGSGGL IEGGSG KGVLLGG IDGVGGG GGGGLSS EAAMFDV<br>YIQLET SRMKLAH LEQEITR#ARQQSAY INRSSNP ATLPAPI DSGVTF EVEYAQW VEEQGRQ TAEHLRAS |
