# Supplementary material
Source: PubMed Central journal article supplement (PMC2245831)

**Supplemental Figure S4.** Phylogenetic relationship among the OsbZIP proteins based on (a) bZIP domain (b) basic and hinge regions (c) leucine zipper defined from the first leucine. The unrooted tree was generated using ClustalX program by neighbor-joining method. Bootstrap values from 1,000 replicates are indicated at each node. Members of group III and VI are coloured orange and blue respectively.

**bZIP Domain  
(Basic Region and Leucine Zipper)**

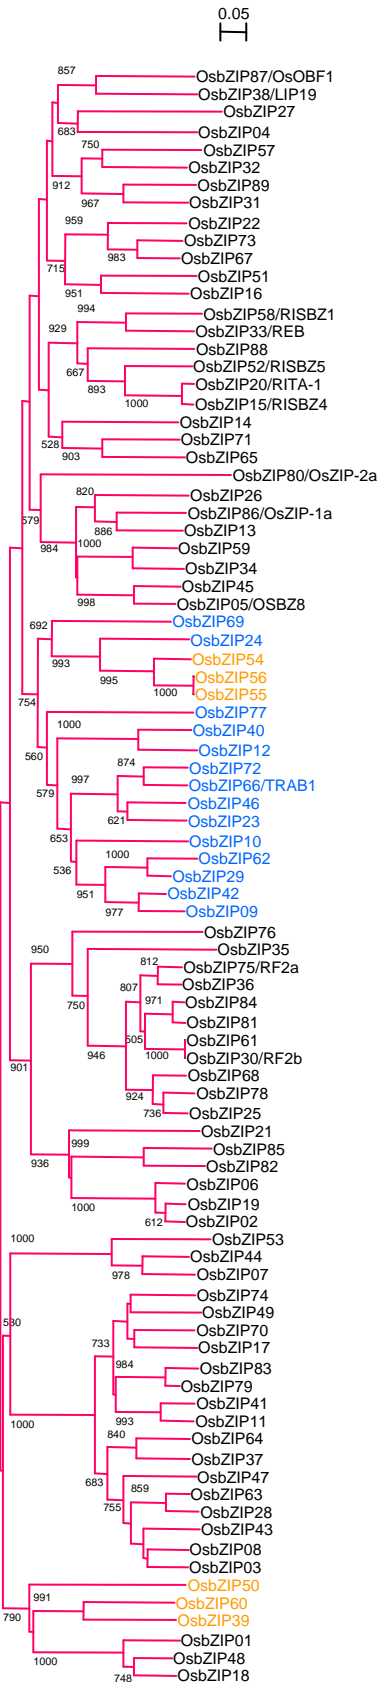

**Basic Region  
(includes hinge region)**

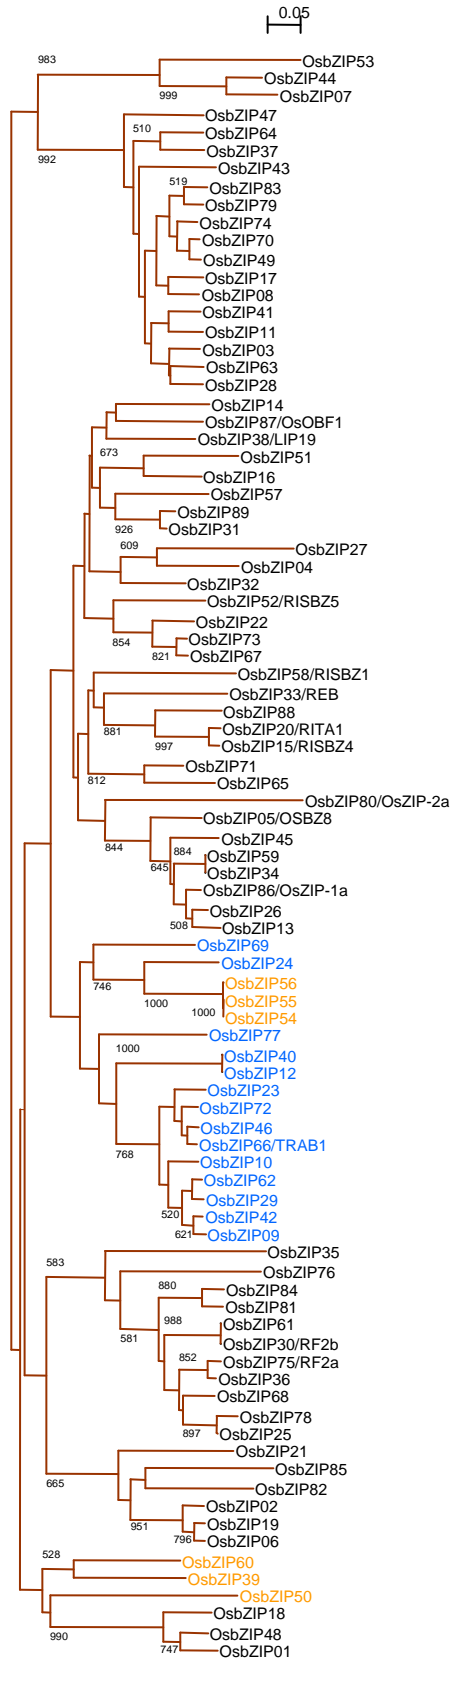

**Leucine Zipper**

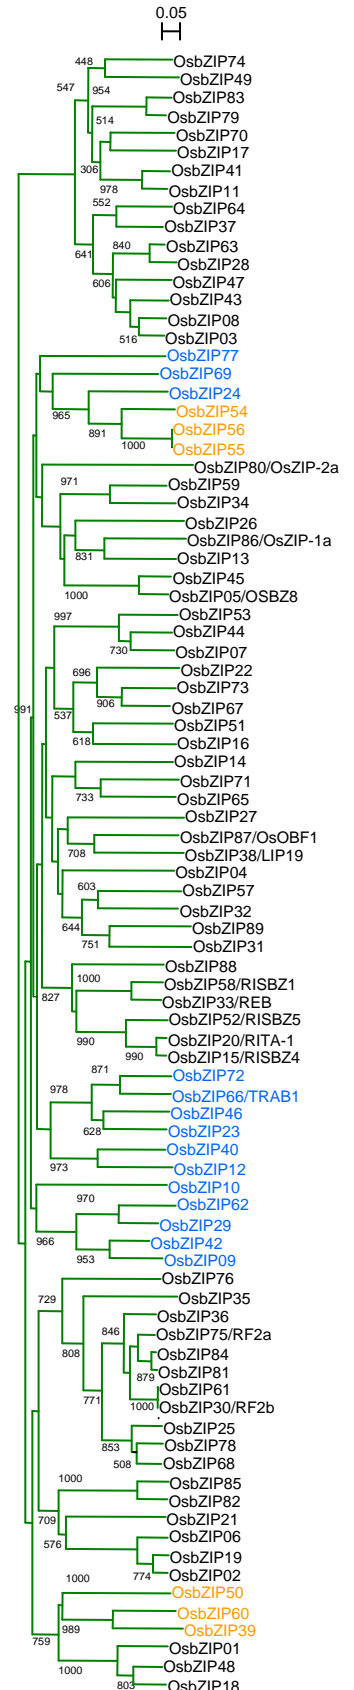

Supplement: plntphys_pp.107.112821_4.pdf [file plntphys_pp.107.112821_4.pdf]
