# Supplementary material
Source: PubMed Central journal article supplement (PMC2245831)

**Supplemental Figure S6.** Organ-specific expression of *OsZIP* genes based on the microarray analysis from an earlier study (Ma et al., 2005). **(A)** Number of genes expressed in various organs (mentioned below each bar) is given. **(B)** Number of genes with organ-specific (mentioned below each bar) expression.

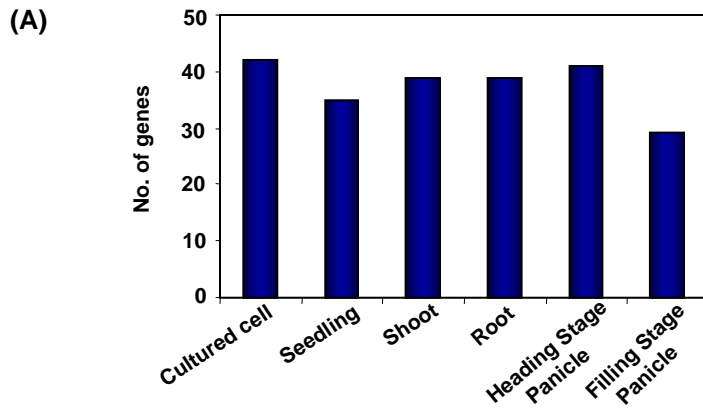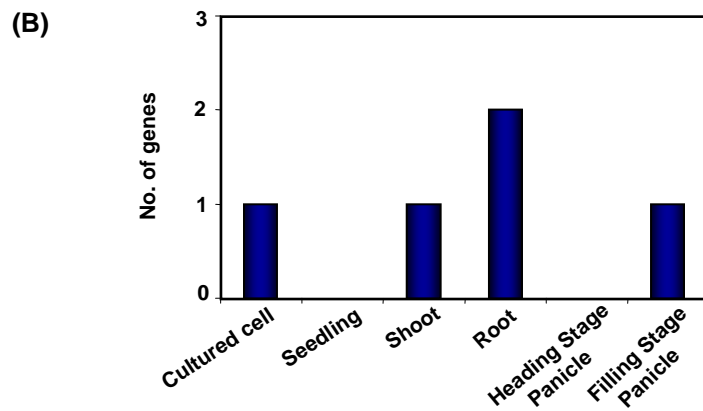

Supplement: plntphys_pp.107.112821_6.pdf [file plntphys_pp.107.112821_6.pdf]
