# Supplementary material
Source: PubMed Central journal article supplement (PMC2245831)
Supplement: plntphys_pp.107.112821_7.pdf [file plntphys_pp.107.112821_7.pdf]

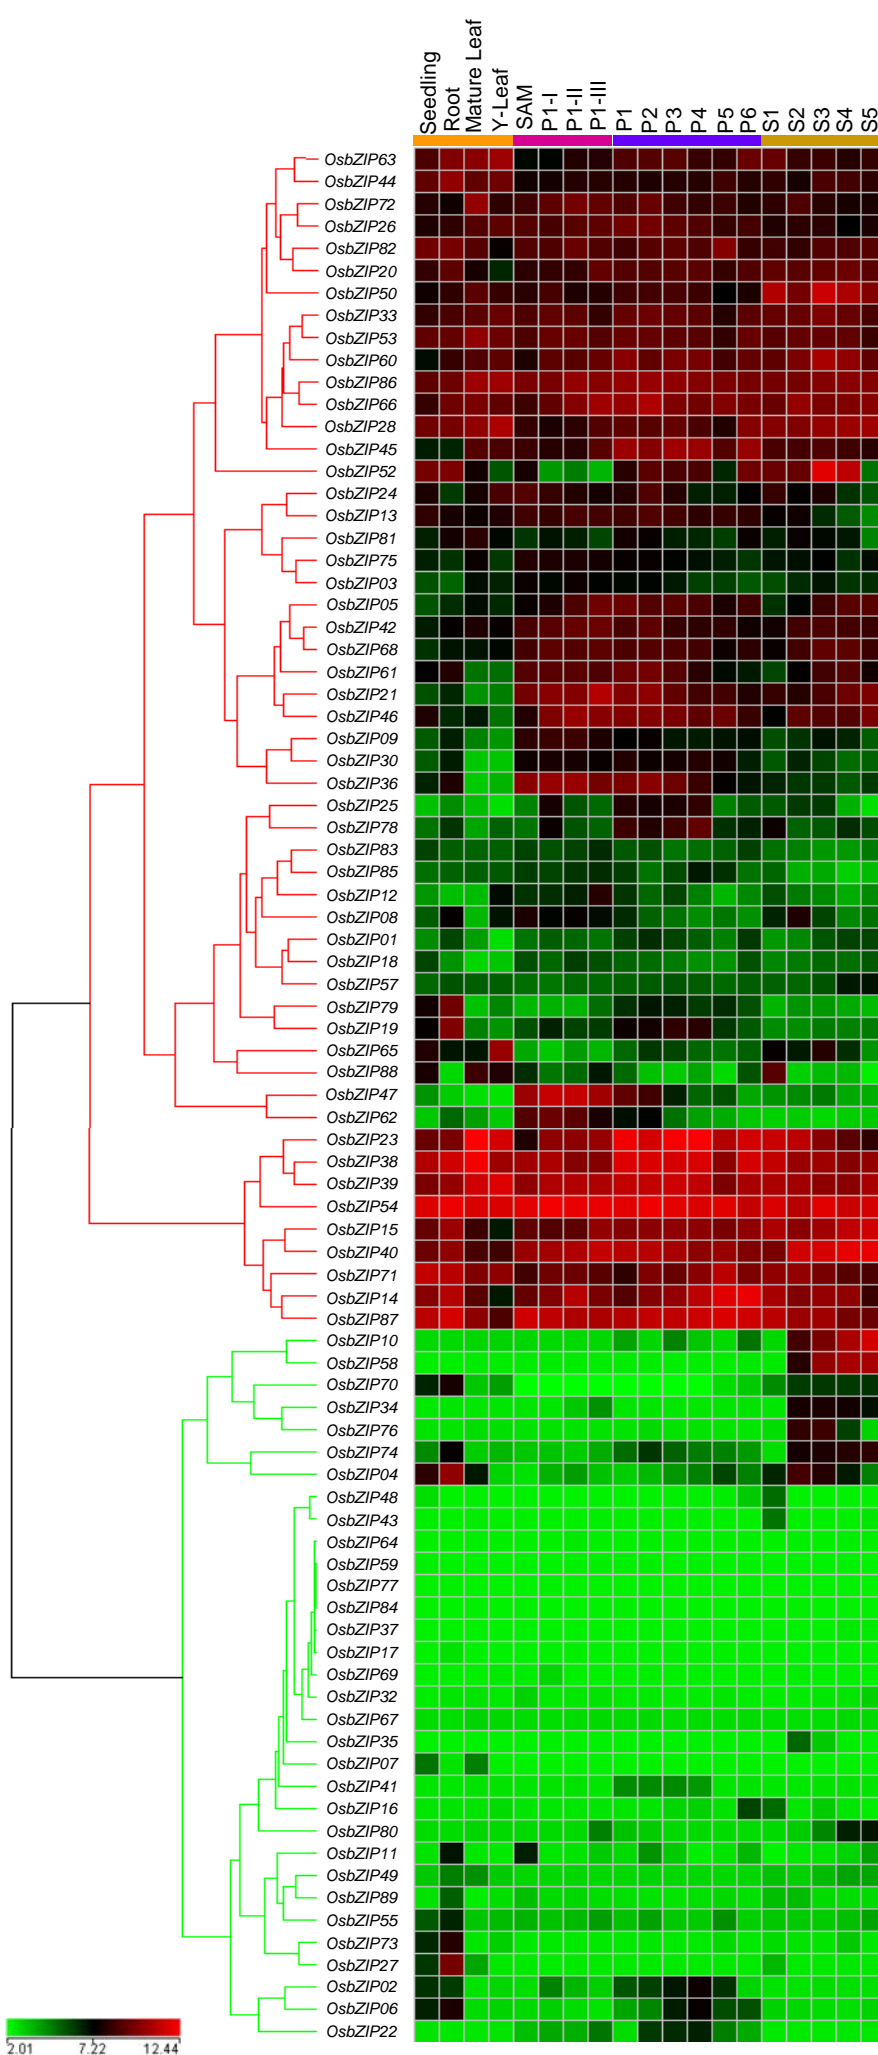

**Supplemental Figure S7.** Hierarchical clustering display of 85 *OsbZIP* genes represented on Affymetrix rice genome array in various rice organs and developmental stages (mentioned at the top of each lane). The average log signal values were used for clustering. The color scale (representing log signal values) is shown at the bottom on the left.
