# Supplementary material
Source: PubMed Central journal article supplement (PMC2245831)
Supplement: plntphys_pp.107.112821_8.pdf [file plntphys_pp.107.112821_8.pdf]

**Supplemental Figure S8.** Real-time PCR analysis of representative *Os*ZIP genes differentially expressed in various tissues/developmental stages and stress treatments.

**(A) Differential expression of *Os*ZIP genes during panicle development**

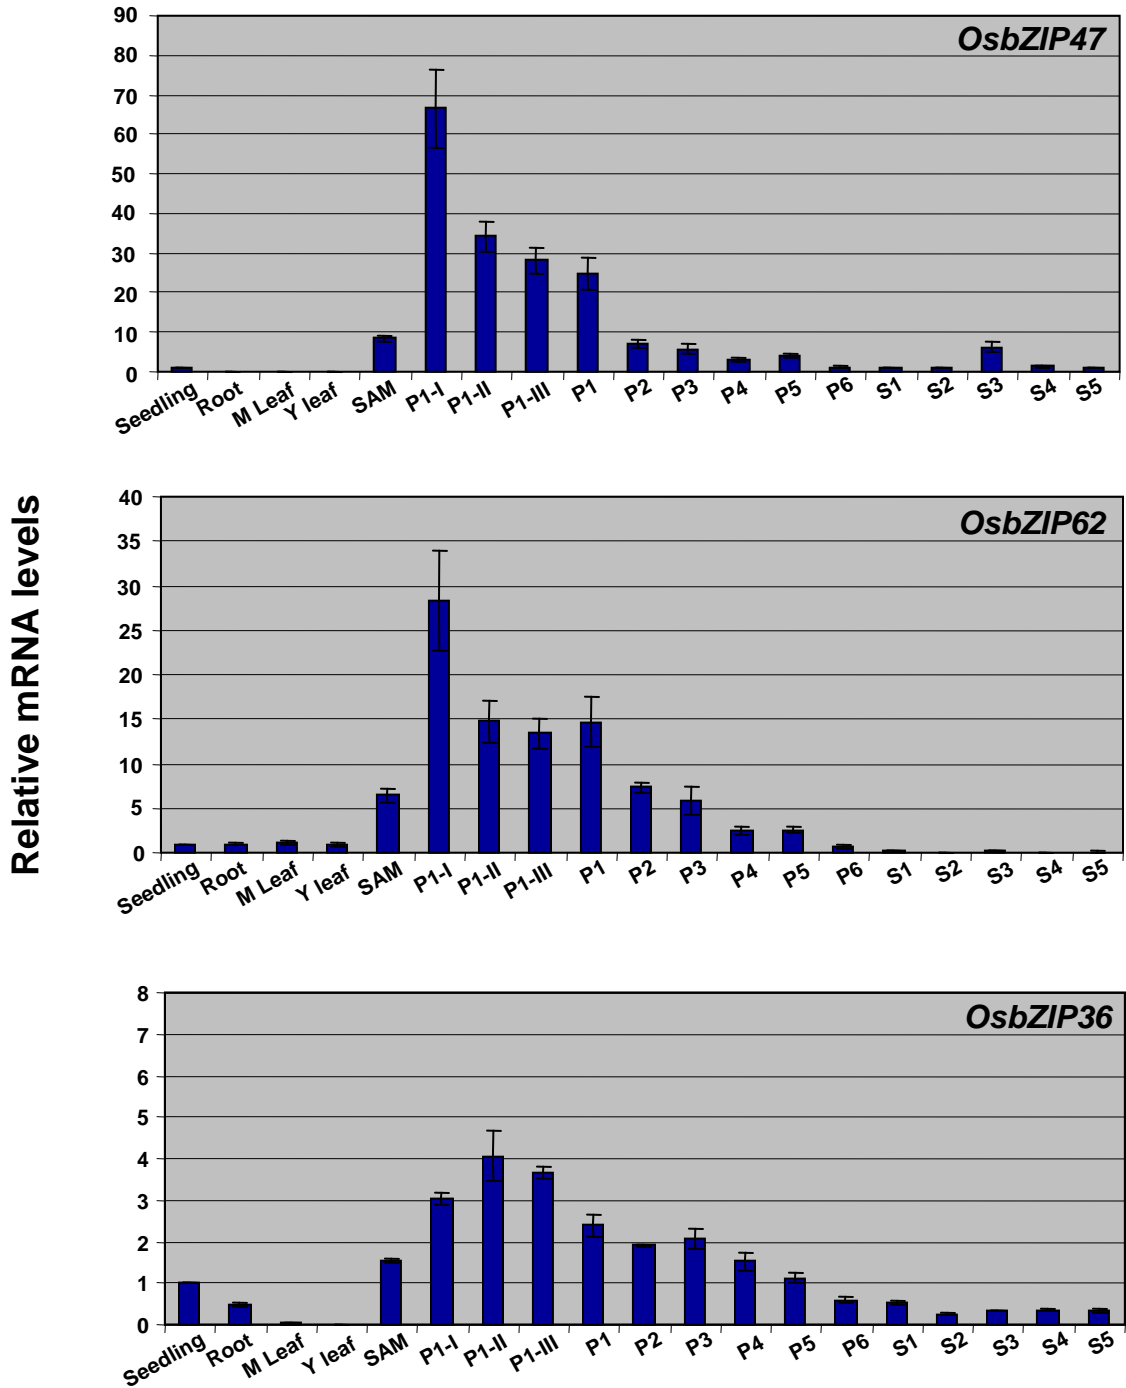

(B) Differential expression of *OsZIP* genes during seed development

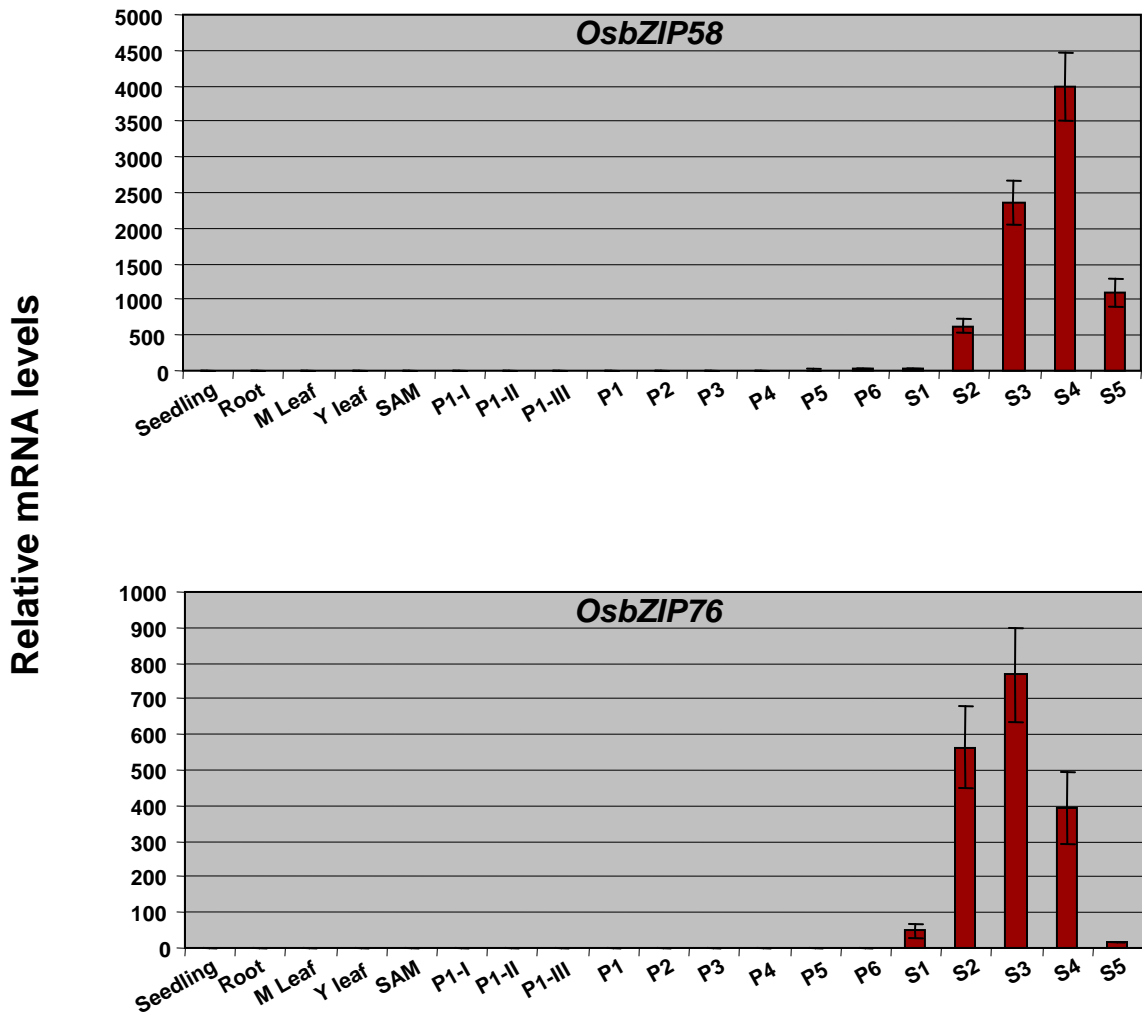

(C) Differential expression of *Os*bZIP genes under abiotic stress conditions

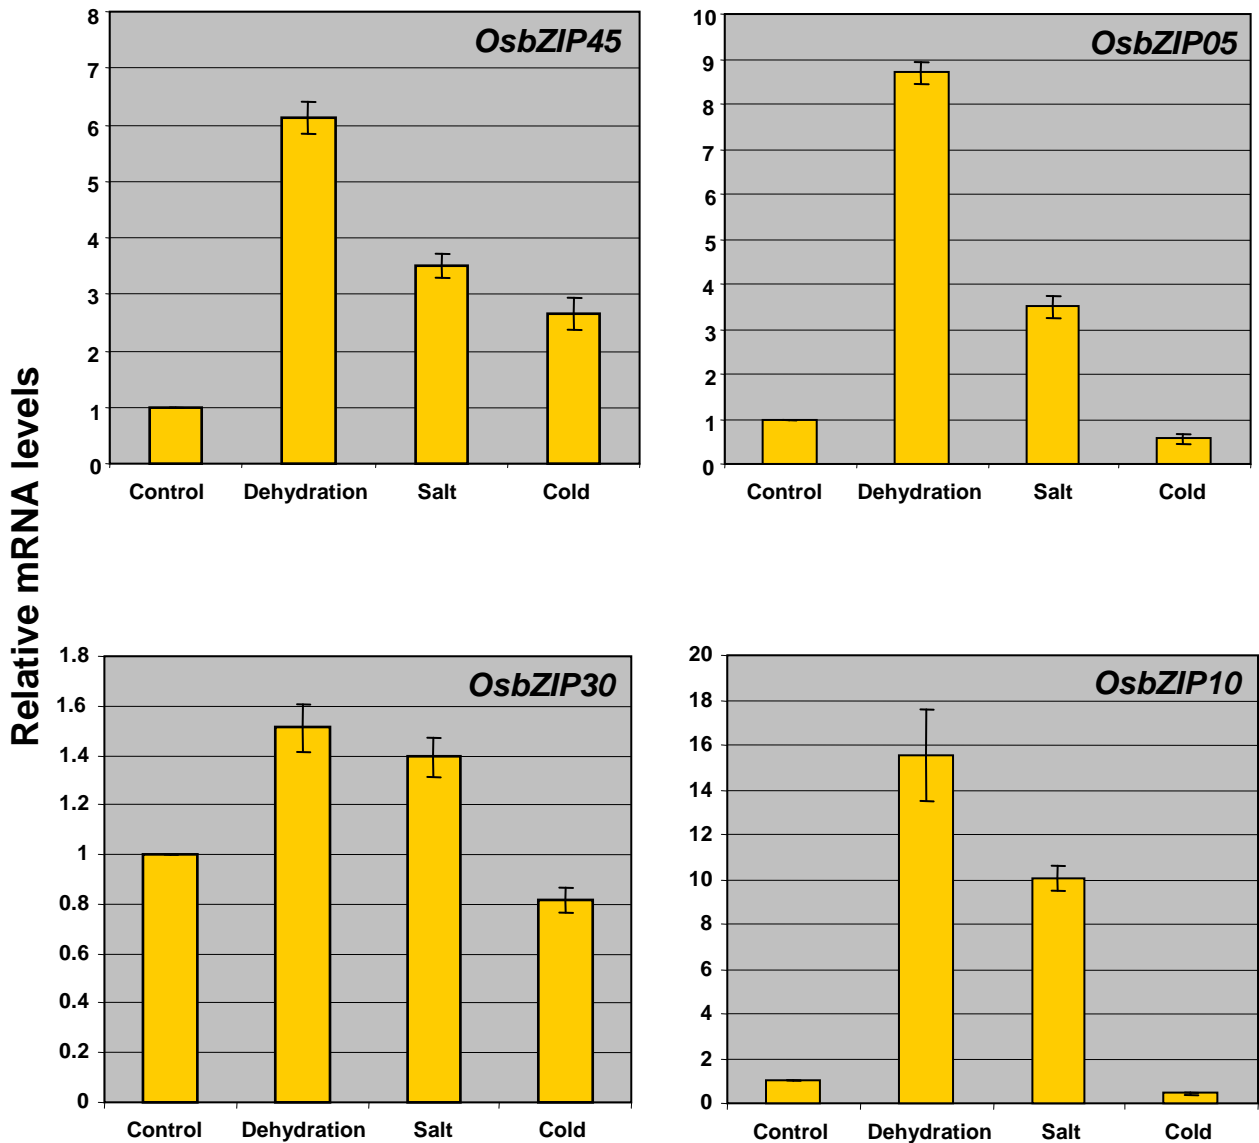

The expression of each gene in different RNA samples was normalized with the expression of internal control gene, *UBQ5*. The mRNA levels for each candidate gene in different tissue samples were calculated relative to its expression in seedlings (A,B) or control (C) using  $\Delta\Delta C_T$  method (Applied Biosystems). The values represented are the mean of two biological replicates, each with three technical replicates. Error bars indicate the standard error.
