# Supplementary material
Source: PubMed Central journal article supplement (PMC2245831)

**Supplemental Figure S9.** Venn diagrams representing number of differentially regulated *Os*bZIP genes in various organs under different light conditions based on the microarray analysis from an earlier study (Jiao et al., 2005). **(A)** Number of up-regulated *Os*bZIP genes. **(B)** Number of down-regulated *Os*bZIP genes. (F: Far-red, R: Red, B: Blue and W: White)

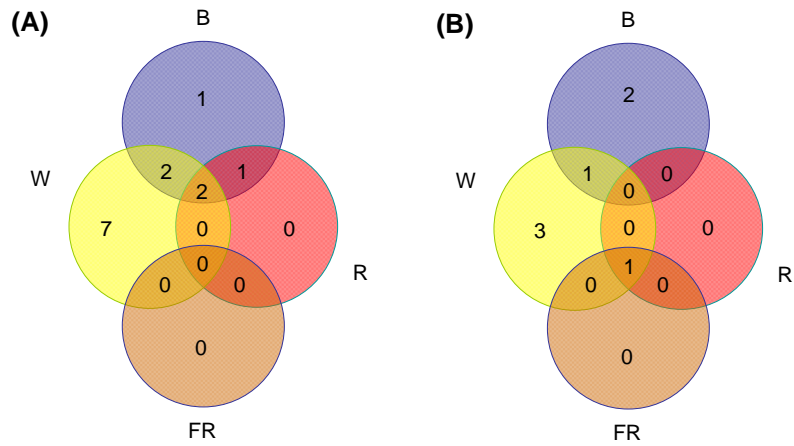

Supplement: plntphys_pp.107.112821_9.pdf [file plntphys_pp.107.112821_9.pdf]
